# Supplementary material for: Asterias forbesi-Inspired SERS Substrates for Wide-Range Detection of Uric Acid
Source: MDPI journal article supplement (doi:10.3390/bios14010008), 2023-12-22
Supplement: s1 [file s1]

Supplementary Materials

# ***Asterias forbesi*-Inspired SERS Substrates for Wide-Range Detection of Uric Acid**

Hyunjun Park <sup>1,†</sup>, Kyunghwan Chai <sup>1,†</sup>, Woochang Kim <sup>1,†</sup>, Joohyung Park <sup>1</sup>, Wonseok Lee <sup>2,\*</sup> and Jinsung Park <sup>1,\*</sup>

<sup>1</sup> Department of Biomechatronic Engineering, College of Biotechnology and Bioengineering, Sungkyunkwan University, Suwon 16419, Republic of Korea

<sup>2</sup> Department of Electrical Engineering, Korea National University of Transportation, Chungju 27469, Republic of Korea

\* Correspondence: wslee@ut.ac.kr (W.L.); nanojspark@skku.edu (J.P.)

† These authors contributed equally to this study.

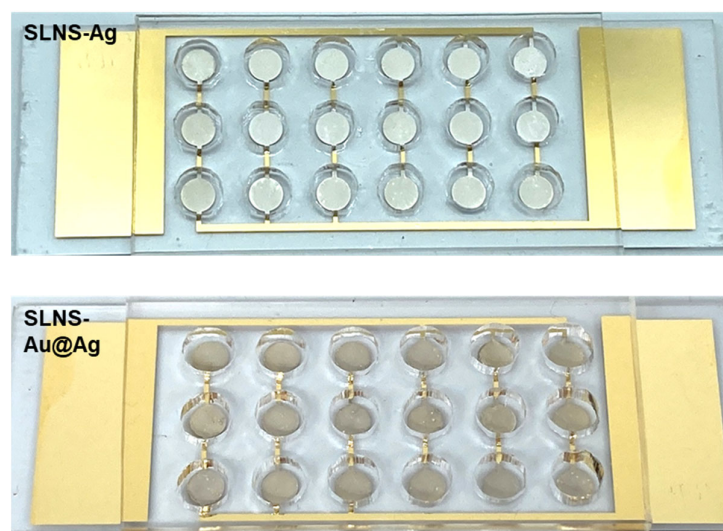

**Figure S1.** Optical images of (a) SLNS-Ag and (b) SLNS-Au@Ag substrates.

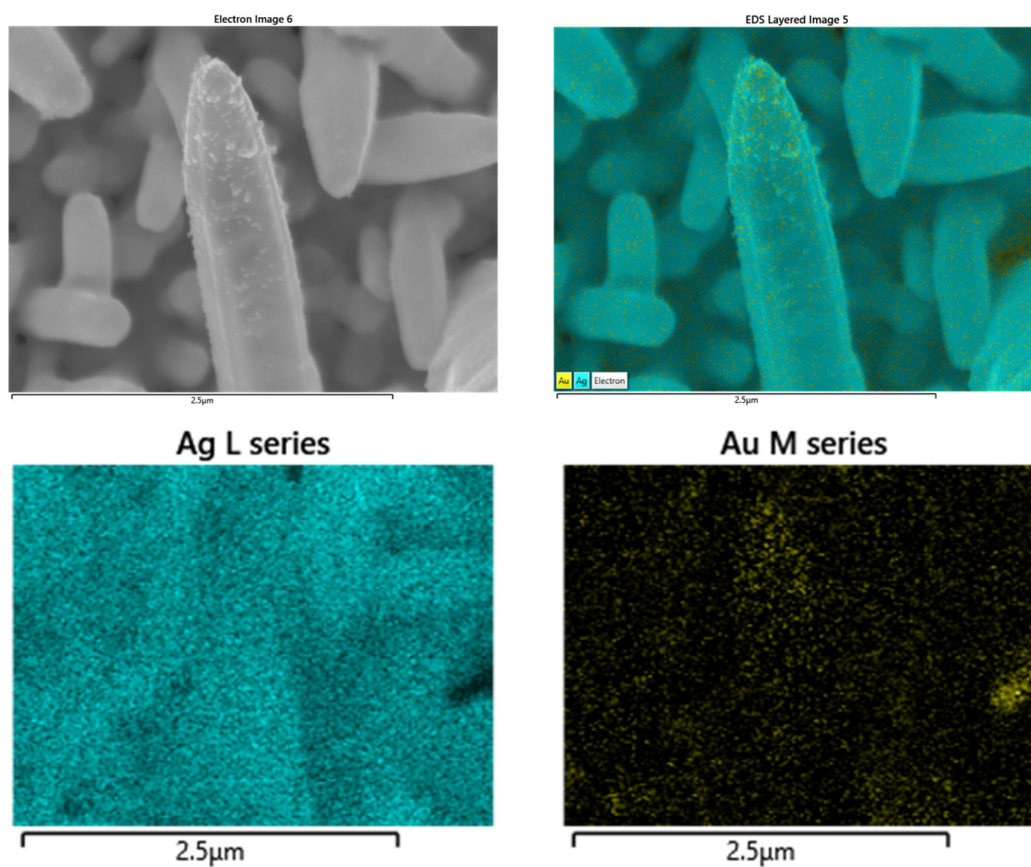

**Figure S2.** SEM-EDS data for AF-SERS substrate.

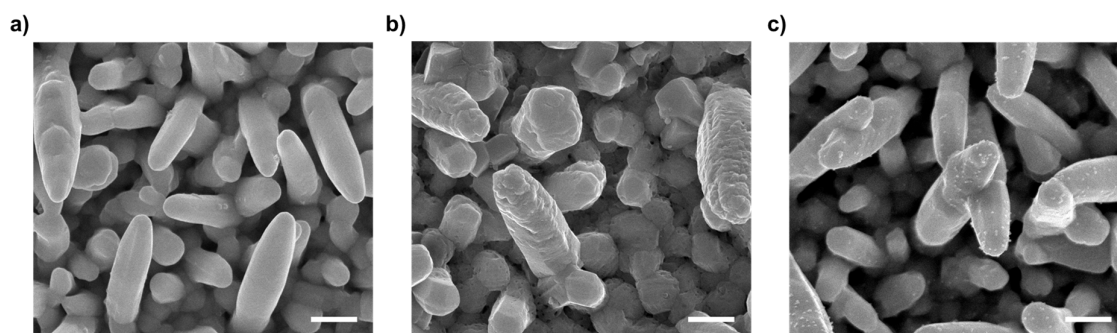

**Figure S3.** a) Raman spectrum of 100 μM R6G on GNP-only and AF-SERS substrate, respectively. b) Raman intensity graph at 1508 cm<sup>-1</sup>, the specific Raman peak of R6G (Scale bar: 500 nm).

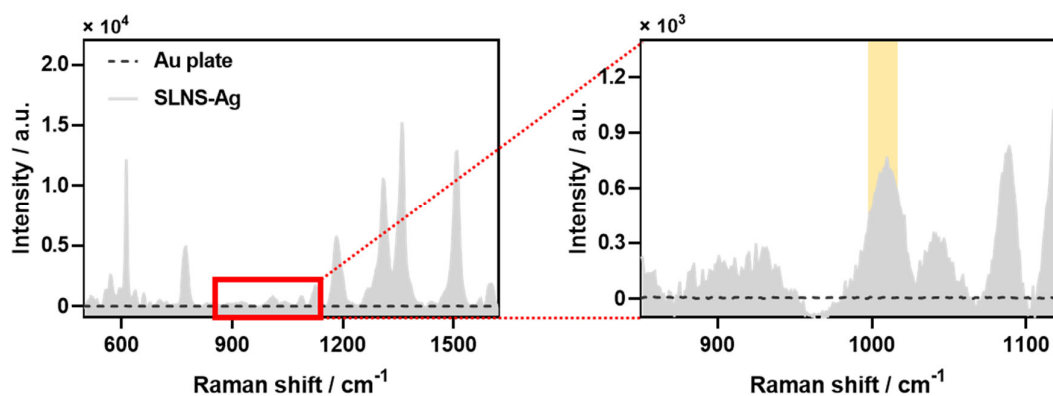

**Figure S4.** Raman spectral data of Au plate and SLNS-Ag substrate for R6G 100  $\mu\text{M}$ . Upon reducing the Y-axis scale in a specific region, the Raman signal of silver was identified at around 1000  $\text{cm}^{-1}$  (indicated by the red square).

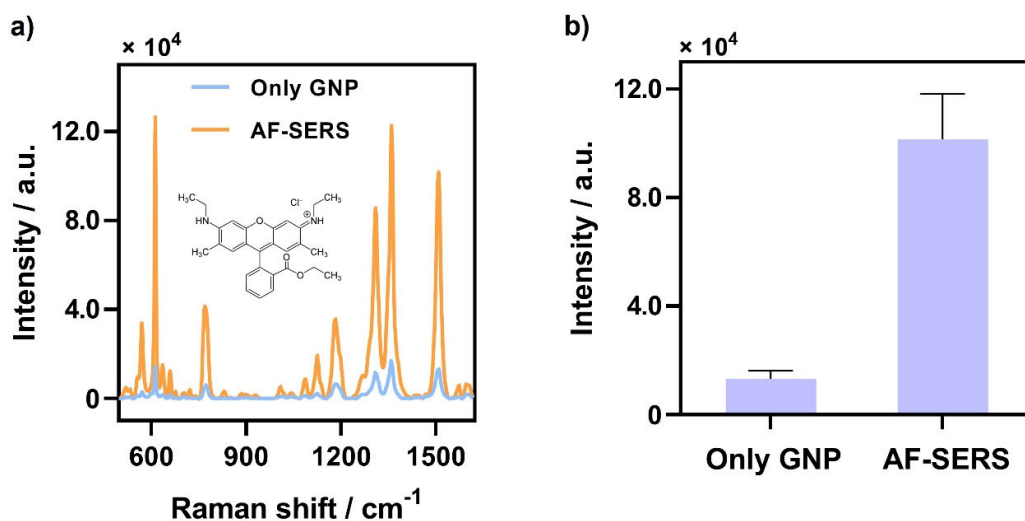

**Figure S5.** a) Raman spectrum of 100  $\mu\text{M}$  R6G on GNP-only and AF-SERS substrate, respectively. b) Raman intensity graph at 1508  $\text{cm}^{-1}$ , the specific Raman peak of R6G.

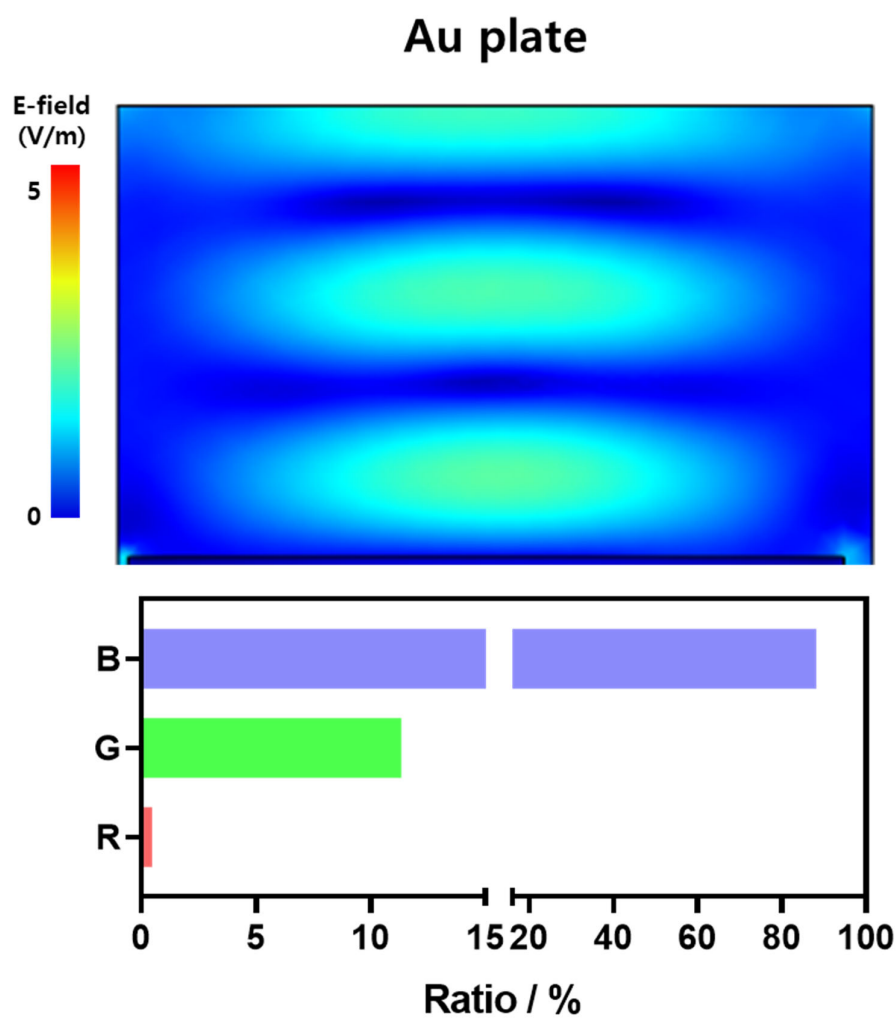

**Figure S6.** FEM-based electromagnetic simulation results for Au plate and RGB ratio spectrum of each area.

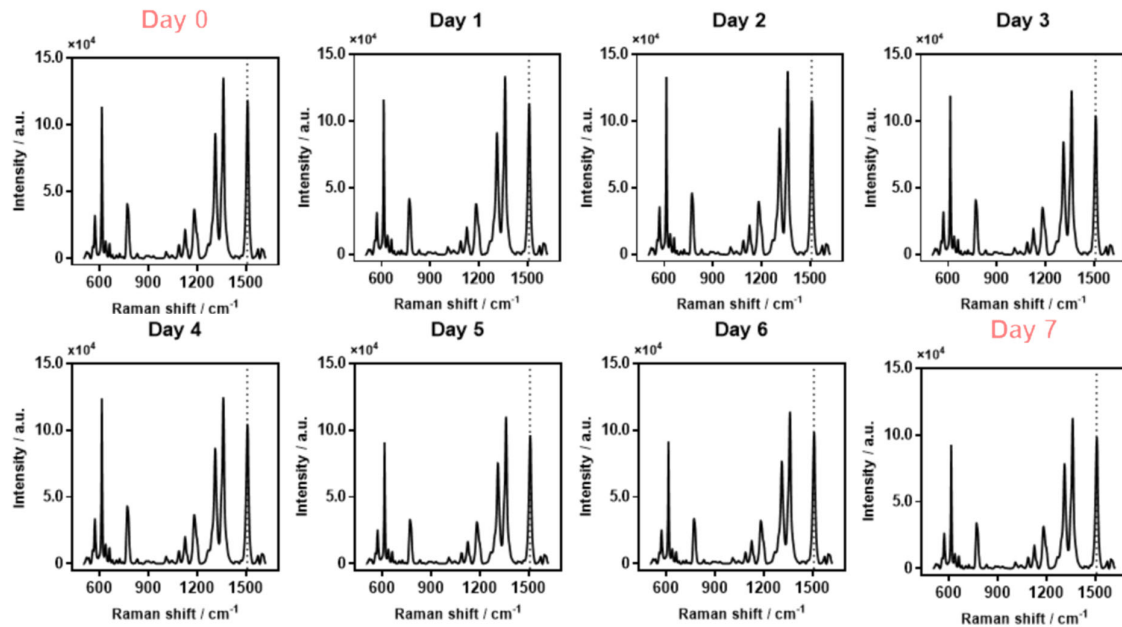

**Figure S7.** Raman spectra of R6G for each day on AF-SERS substrate when exposed to harsh conditions (PBS buffer solution) for 7 days.

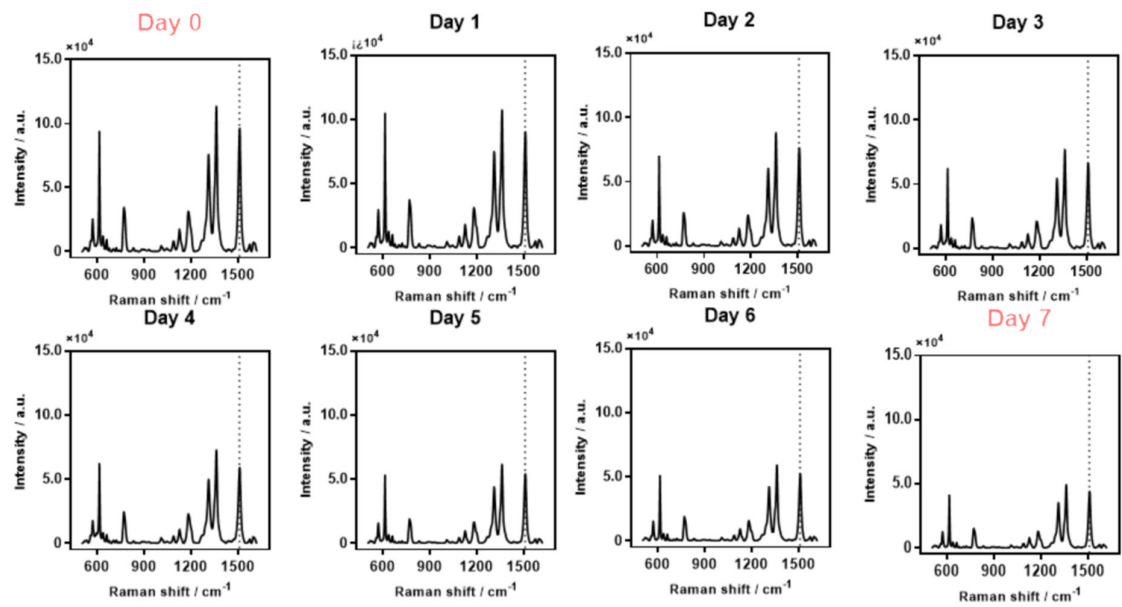

**Figure S8.** Raman spectra of R6G for each day on GNP + SLNS-Ag substrate when exposed to harsh conditions (PBS buffer solution) for 7 days.

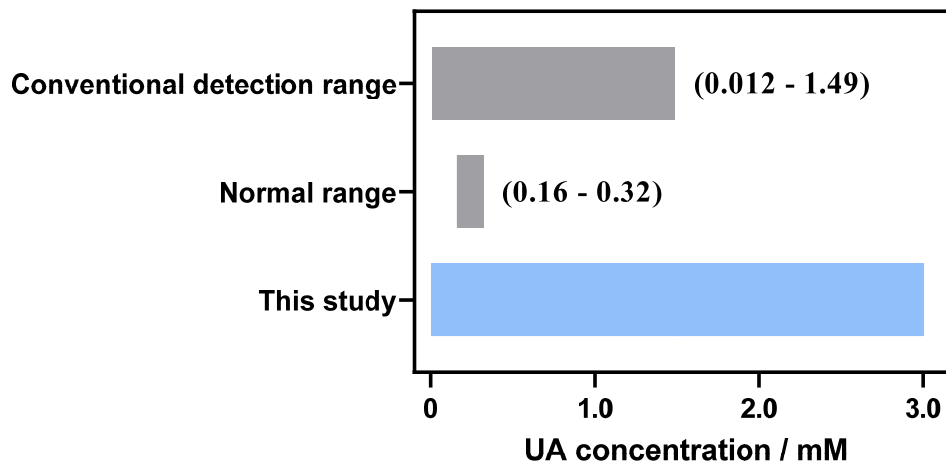

**Figure S9.** A graph comparing the excretion concentration range of uric acid in the body using conventional technology, the normal range of uric acid, and the detection range of uric acid using AF-SERS substrate.

**Table S1.** Comparison of enhancement factor performance of SERS substrates using various nano-materials.

| Year | Substrate                                                                                                | Enhancement Factor     | Reference |
|------|----------------------------------------------------------------------------------------------------------|------------------------|-----------|
| 2020 | Au nanocone                                                                                              | $8.5 \times 10^6$      | [1]       |
| 2021 | Au@Ag hollow nanocubes                                                                                   | $7.52 \times 10^9$     | [2]       |
| 2022 | Opal structure                                                                                           | $4.22 \times 10^4$     | [3]       |
| 2023 | Octahedral oxygen vacancy MnCo <sub>2</sub> O <sub>4</sub> /Ag (VO-MnCo <sub>2</sub> O <sub>4</sub> /Ag) | $2.7 \times 10^6$      | [4]       |
| 2023 | CdSe quantum dot                                                                                         | $5.05 \times 10^6$     | [5]       |
| 2024 | 3D nanosilver trees/sea-urchin-like gold                                                                 | $1.9 \times 10^7$      | [6]       |
| 2023 | AF-SERS                                                                                                  | $3.658 \times 10^{11}$ | This work |

**Table S2.** Vibrational SERS band assignments for uric acid.

| Raman Shift / cm <sup>-1</sup> | Vibrational Band Assignment <sup>[7,8]</sup> |
|--------------------------------|----------------------------------------------|
| 508 (vwsh)                     | C-N-C ring vibrations                        |
| 534 (vw)                       |                                              |
| 592 (vw)                       | Ring breathing mode                          |
| 640 (s)                        | Skeletal ring deformation                    |
| 730 (w)                        | N-H bending                                  |
| 812 (m)                        | Ring vibration                               |
| 889 (m)                        | N-H bending                                  |
| 1017 (w)                       | Ring vibration                               |
| 1134 (vs)                      | C-N                                          |
| 1206 (m)                       | N-C-C stretching and bending                 |
| 1554 (m)                       | C-N stretching                               |

**Table S3.** Comparison of SERS sensing performances of our AF-SERS and various other sensing platforms for UA.

| Detection Method | Detection Range | Detection Limit | Reference |
|------------------|-----------------|-----------------|-----------|
| Electrochemical  | 800 pM–241 μM   | 300 pM          | [9]       |
| Electrochemical  | 100 nM–30 μM    | 23 nM           | [10]      |
| Electrochemical  | 4–200 μM        | 1.36 μM         | [11]      |
| Fluorescence     | 10–100 μM       | 1.2 μM          | [12]      |
| Fluorescence     | 0.2–150 μM      | 0.05 μM         | [13]      |

|              |                   |                |                  |
|--------------|-------------------|----------------|------------------|
| Fluorescence | 10–100 $\mu$ M    | 1.214 $\mu$ M  | [14]             |
| SERS         | 5 $\mu$ M–1 mM    | 1.7 $\mu$ M    | [15]             |
| SERS         | 0.2–1000 $\mu$ M  | 0.1 $\mu$ M    | [16]             |
| SERS         | 20–100 $\mu$ M    | 20 $\mu$ M     | [17]             |
| <b>SERS</b>  | <b>10 nM–1 mM</b> | <b>1.18 nM</b> | <b>This work</b> |

## References

- Huang, C.Y.; Hsiao, H.C. Integrated EC-SERS Chip with Uniform Nanostructured EC-SERS Active Working Electrode for Rapid Detection of Uric Acid. *Sensors* **2020**, Vol. 20, Page 7066 **2020**, 20, 7066, doi:10.3390/S20247066.
- Bhattacharjee, G.; Majumder, S.; Senapati, D.; Banerjee, S.; Satpati, B. Core-Shell Gold @silver Hollow Nanocubes for Higher SERS Enhancement and Non-Enzymatic Biosensor. *Mater Chem Phys* **2020**, 239, 122113, doi:10.1016/J.MATCHEM-PHYS.2019.122113.
- Li, J.; Cui, X.; Yang, X.; Qiu, Y.; Li, Y.; Cao, H.; Wang, D.; He, W.; Feng, Y.; Yang, Z. Quantification of Uric Acid Concentration in Tears by Using PDMS Inverse Opal Structure Surface-Enhanced Raman Scattering Substrates: Application in Hyperuricemia. *Spectrochim Acta A Mol Biomol Spectrosc* **2022**, 278, 121326, doi:10.1016/J.SAA.2022.121326.
- Tan, Y.; Qi, M.; Jiang, H.; Wang, B.; Zhang, X. Determination of Uric Acid in Serum by SERS System Based on VO-MnCo<sub>2</sub>O<sub>4</sub>/Ag Nanzyme. *Anal Chim Acta* **2023**, 1274, 341584, doi:10.1016/J.ACA.2023.341584.
- Wang, K.; Chen, Z.; Li, Y.; Zhang, Y. Top-down Produced CdSe Quantum Dots as an Ultrasensitive SERS Platform for the Detection of Uric Acid. *Mater Chem Front* **2023**, 7, 1624–1632, doi:10.1039/D2QM01275H.
- Lin, X.; Li, L.J.; Guo, H.Y.X.; Li, R.; Feng, J. Preparation of 3D Nano Silver Trees/Sea Urchin-like Gold and SERS Detection of Uric Acid. *Spectrochim Acta A Mol Biomol Spectrosc* **2024**, 305, 123464, doi:10.1016/J.SAA.2023.123464.
- Westley, C.; Xu, Y.; Carnell, A.J.; Turner, N.J.; Goodacre, R. Label-Free Surface Enhanced Raman Scattering Approach for High-Throughput Screening of Biocatalysts. **2016**, doi:10.1021/acs.analchem.6b00813.
- Goodall, B.L.; Robinson, A.M.; Brosseau, C.L. Electrochemical- Surface Enhanced Raman Spectroscopy (E-SERS) of Uric Acid : A Potential Rapid Diagnostic Method for Early Preeclampsia Detection. *Physical Chemistry Chemical Physics* **2013**, 15, 1382–1388, doi:10.1039/C2CP42596C.
- Kokulnathan, T.; Wang, T.J.; Kumar, E.A.; Duraisamy, N.; An-Ting Lee An Electrochemical Platform Based on Yttrium Oxide/Boron Nitride Nanocomposite for the Detection of Dopamine. *Sens Actuators B Chem* **2021**, 349, 130787, doi:10.1016/J.SNB.2021.130787.
- Zhu, X.; Xuan, L.; Gong, J.; Liu, J.; Wang, X.; Xi, F.; Chen, J. Three-Dimensional Macroscopic Graphene Supported Vertically-Ordered Mesoporous Silica-Nanochannel Film for Direct and Ultrasensitive Detection of Uric Acid in Serum. *Talanta* **2022**, 238, 123027, doi:10.1016/J.TALANTA.2021.123027.
- Wang, H.; Xie, A.; Li, S.; Wang, J.; Chen, K.; Su, Z.; Song, N.; Luo, S. Three-Dimensional g-C<sub>3</sub>N<sub>4</sub>/MWNTs/GO Hybrid Electrode as Electrochemical Sensor for Simultaneous Determination of Ascorbic Acid, Dopamine and Uric Acid. *Anal Chim Acta* **2022**, 1211, 339907, doi:10.1016/J.ACA.2022.339907.
- Zhao, X.Y.; Yang, Q.S.; Wang, J.; Fu, D.L.; Jiang, D.K. A Novel 3D Coordination Polymer Constructed by Dual-Ligand for Highly Sensitive Detection of Purine Metabolite Uric Acid. *Spectrochim Acta A Mol Biomol Spectrosc* **2021**, 262, 120065, doi:10.1016/J.SAA.2021.120065.
- Li, F.; Chen, J.; Wen, J.; Peng, Y.; Tang, X.; Qiu, P. Ratiometric Fluorescence and Colorimetric Detection for Uric Acid Using Bifunctional Carbon Dots. *Sens Actuators B Chem* **2022**, 369, 132381, doi:10.1016/J.SNB.2022.132381.
- Sumalatha, V.; Anujya, C.; Balchander, V.; Dhanalaxmi, B.; Pradeep Kumar, M.; Ayodhya, D. Hydrothermal Fabrication of N-CeO<sub>2</sub>/p-CuS Heterojunction Nanocomposite for Enhanced Photodegradation of Pharmaceutical Drugs in Wastewater under Visible-Light and Fluorometric Sensor for Detection of Uric Acid. *Inorg Chem Commun* **2023**, 155, 110962, doi:10.1016/J.INO-CHE.2023.110962.
- Lu, D.; Cai, R.; Liao, Y.; You, R.; Lu, Y. Two-Dimensional Glass/p-ATP/Ag NPs as Multifunctional SERS Substrates for Label-Free Quantification of Uric Acid in Sweat. *Spectrochim Acta A Mol Biomol Spectrosc* **2023**, 296, 122631, doi:10.1016/J.SAA.2023.122631.
- Jiang, L.; Wang, L.; Zhan, D.S.; Jiang, W.R.; Fodjo, E.K.; Hafez, M.E.; Zhang, Y.M.; Zhao, H.; Qian, R.C.; Li, D.W. Electrochemically Renewable SERS Sensor: A New Platform for the Detection of Metabolites Involved in Peroxide Production. *Biosens Bioelectron* **2021**, 175, 112918, doi:10.1016/J.BIOS.2020.112918.
- Durai, L.; Badhulika, S. A Wearable PVA Film Supported TiO<sub>2</sub> Nanoparticles Decorated NaNbO<sub>3</sub> Nanoflakes-Based SERS Sensor for Simultaneous Detection of Metabolites and Biomolecules in Human Sweat Samples. *Adv Mater Interfaces* **2022**, 9, 2200146, doi:10.1002/ADMI.202200146.
